# Supplementary material
Source: Springer Nature journal article supplement (https://www.springermedizin.de/resource/supplementary/13058_2010_9465_MOESM12_ESM.pdf/9702232)
Supplement: MOESM12 [file 9702232]

**Table 1. Paired HN and DCIS sample summary**

| Sample     | Age (years) | Grade of DCIS | Histology of DCIS        | ER/PR/HER2 of IDC | IDC Grade   |
|------------|-------------|---------------|--------------------------|-------------------|-------------|
| 379        | 43          | 2 and 3       | Cribiform                | +/+/+             | 2           |
| 444        | 48          | 2             | Cribiform                | +/+/NA            | Not present |
| 248        | 49          | 1             | Micropapillary           | +/+/NA            | 2           |
| 274        | 49          | 2             | Solid                    | +/+/-             | 1           |
| 380        | 53          | 2 and 3       | Solid/Cribiform          | +/+/-             | 2           |
| 446B       | 54          | 3             | Comedo/Solid             | +/+/-             | 2           |
| 258        | 65          | 1 and 2       | Cribiform/Micropapillary | +/+/-             | 2           |
| 405        | 67          | 2             | Micropapillary/Cribiform | +/+/-             | 2           |
| Mean Age   | 53.5        |               |                          |                   |             |
| Median Age | 51.0        |               |                          |                   |             |

Abbreviations: NA=not applicable; HN=histologically normal; DCIS=ductal carcinoma *in situ*; ER=estrogen receptor; PR=progesterone receptor; HER2=human epidermal growth factor receptor-2; IDC=invasive ductal carcinoma.
